# Supplementary material for: Hearing Impairment Increases Economic Inequality
Source: PubMed Central journal article supplement — Clin Exp Otorhinolaryngol. 2021 Mar 30;14(3):278–86. doi: 10.21053/ceo.2021.00325 (PMC8373834; doi:10.21053/ceo.2021.00325), 2021-03-30
Supplement: ceo-2021-00325-suppl2.pdf [file ceo-2021-00325-suppl2.pdf]

**Supplementary Table 2.** Mean values and 95% confidence interval of income

| Variable                      | Initial           | Post 1 yr         | Post 2 yr         | Post 3 yr         | Post 4 yr         | Post 5 yr         |
|-------------------------------|-------------------|-------------------|-------------------|-------------------|-------------------|-------------------|
| Total participants (n=29,285) |                   |                   |                   |                   |                   |                   |
| Hearing impairment            | 5.829 (5.79–5.87) | 5.902 (5.86–5.94) | 5.968 (5.93–6.01) | 6.012 (5.97–6.05) | 6.073 (6.03–6.11) | 6.102 (6.06–6.14) |
| Control                       | 5.829 (5.75–5.91) | 5.831 (5.75–5.91) | 5.852 (5.77–5.93) | 5.886 (5.80–5.97) | 5.965 (5.88–6.05) | 5.986 (5.90–6.07) |
| Age <65 yr, male (n=9,345)    |                   |                   |                   |                   |                   |                   |
| Hearing impairment            | 5.789 (5.69–5.89) | 5.696 (5.56–5.83) | 5.685 (5.55–5.82) | 5.703 (5.57–5.84) | 5.765 (5.63–5.90) | 5.706 (5.57–5.84) |
| Control                       | 5.789 (5.72–5.86) | 5.870 (5.80–5.94) | 5.917 (5.85–5.98) | 5.918 (5.85–5.98) | 6.002 (5.94–6.07) | 6.002 (5.94–6.07) |
| Age <65 yr, female (n=5,210)  |                   |                   |                   |                   |                   |                   |
| Hearing impairment            | 4.854 (4.67–5.04) | 4.993 (4.81–5.18) | 5.033 (4.85–5.22) | 4.992 (4.80–5.18) | 5.205 (5.02–5.39) | 5.322 (5.13–5.51) |
| Control                       | 4.854 (4.76–4.95) | 5.073 (4.98–5.17) | 5.205 (5.11–5.30) | 5.296 (5.20–5.39) | 5.382 (5.29–5.48) | 5.425 (5.33–5.52) |
| Age ≥65 yr, male (n=8,790)    |                   |                   |                   |                   |                   |                   |
| Hearing impairment            | 6.291 (6.14–6.44) | 6.321 (6.17–6.47) | 6.381 (6.23–6.53) | 6.437 (6.28–6.59) | 6.531 (6.38–6.68) | 6.590 (6.44–6.74) |
| Control                       | 6.291 (6.22–6.37) | 6.313 (6.24–6.39) | 6.375 (6.30–6.45) | 6.464 (6.39–6.54) | 6.556 (6.48–6.63) | 6.632 (6.56–6.71) |
| Age ≥65 yr, female (n=5,940)  |                   |                   |                   |                   |                   |                   |
| Hearing impairment            | 6.061 (5.87–6.25) | 6.051 (5.86–6.25) | 6.052 (5.86–6.25) | 6.158 (5.96–6.35) | 6.134 (5.94–6.33) | 6.157 (5.96–6.35) |
| Control                       | 6.061 (5.96–6.16) | 6.087 (5.99–6.18) | 6.149 (6.05–6.24) | 6.179 (6.08–6.28) | 6.167 (6.07–6.26) | 6.194 (6.10–6.29) |

Values are presented as mean (95% confidence interval).
